# Supplementary material for: Determining households from patient addresses and unique property reference numbers in general practitioner electronic health records
Source: PubMed Central journal article supplement — Int J Popul Data Sci. 2024 Apr 9;9(1):2379. doi: 10.23889/ijpds.v9i1.2379 (PMC11626511; doi:10.23889/ijpds.v9i1.2379), 2024-04-09

## Supplementary Appendices

### Supplementary Appendix 1

Household method logic coded in Python

```
#!/usr/bin/env python3

# new_pae.py
# Script takes 1 parameter: event_date (date to define place of residence )
# eg python3 new_pae.py '2012-01-01'

# Import libraries/modules
import pymssql # interacting with Microsoft SQL Server
import pandas as pd # data manipulation and analysis
import configparser # reading configuration files
from datetime import datetime # datetime class from the datetime module
import sys

#####
#####
#      FUNCTIONS
#####
#####

#### function DH() converts a date string ("YYYY-MM-DD") into a numeric (ret)
# runs faster than the pandas.to_datetime()
def DH(date):
    if (date == "None"): return 0 # Return 0 if the date is "None"

    # Split the date string into year, month, day and convert to integer
    z = date.split("-")
    year, month, day = z[0], z[1], z[2]
    y, m, d = int(year), int(month), int(day)

    # Calculate the number of leap years (r) and days (ret) since 1840 and days in February (leap)
    r = round((y - 1) // 4) - (round((y - 1) // 100)) + (round((y - 1) // 400)) - 446
    ret = 366 * r + ((y - 1841 - r) * 365) + d
    leap = 29 if (y % 4 > 0) else 28 if (y % 100 > 0) else 29 if (y % 400 > 0) else 28

    # Add the number of days for each month (var) prior to the current month
    var = [31, leap, 31, 30, 31, 30, 31, 31, 30, 31, 30, 31]
    for i in range(len(var)):
        m = m - 1
        if (m == 0): break
        ret = ret + var[i]

    return ret # Return the numerical representation of the date (ret)

#### function read_ini_extra() reads configuration from an INI file or a dictionary array.
# Extracts database connection parameters, NAME and DEBUG settings.
def read_ini_extra(file_path, dict_obj=None):
    global ZDB, ZUSER, ZPASS, ZHOST, ZPORT # Declare global variables to store database connection parameters

    # Use ConfigParser() to read ini file or dictionary
    config = configparser.ConfigParser()
    if dict_obj:
        config.read_dict(dict_obj)
    else:
        config.read(file_path)
```

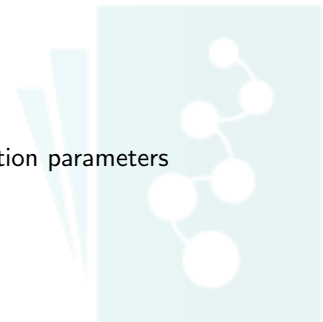

```

# Get the value of DEBUG setting and convert it to boolean
debug = config["APP"].getboolean("DEBUG")

# Get the value of NAME setting
name = config.get('APP', 'NAME', fallback='NAME is not defined')

# Get the database connection parameters
ZDB = config["DATABASE"].get("DB") # Database name
ZUSER = config["DATABASE"].get("USERNAME") # Database username
ZPASS = config["DATABASE"].get("PASSWORD") # Database password
ZHOST = config["DATABASE"].get("HOST") # Database host
ZPORT = config.get('DATABASE', 'PORT', fallback='PORT is not defined') # Database port with a fallback value if not
defined

return debug # Return the DEBUG setting (debug)

##### function GMSV3 determines the GMS registration status of a patient based on the event date.
# Checks if the patient exists and not deceased. Iterates through the patient's registration record (episodes of care) to determine
their status.
def GMSV3(nor, event_date):
    b = 2
    zevent_date = DH(event_date) # Use DH() to convert event_date to numeric

    # Check if patient exists + if patient is deceased
    if (nor not in patient):
        return 4 # Patient not found

    dod = patient[nor][0] # Get date of death

    if (not str(dod) == "None"):
        dod_h = DH(str(dod))
        if (zevent_date >= dod_h):
            return b # Patient is deceased

    # Iterate through the patient's episodes of care record
    # Check the episode is for a Regular/GMS registration (not dummy, emergency, temporary etc)
    # Check if the event date falls within or on the episode start and end dates + episode was active
    for i in x[nor]:
        z = i.split("~")
        id = z[0]
        date_start = z[1]
        date_end = z[2]
        type = z[3]

        d1 = DH(date_start)
        d2 = DH(date_end)

        if (type != "1335267"):
            continue # If registration type is not 1335267 (Regular/GMS patient), skip

        if (not d1==0 and d1 >zevent_date):
            continue # If the episode start date is after the event date, skip

        if (d1 <= zevent_date and d2 == 0):
            b = 1
            break # episode was active on the event date

        if (d2 >= zevent_date and d2 >= d1):
            b = 1
            break # event date falls within the episode date range

```

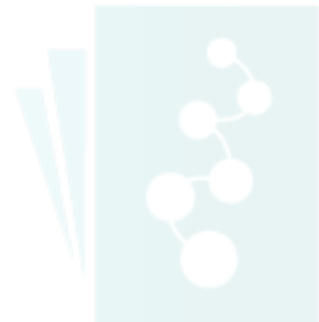

```

if (d1 < zevent_date and d2 < d1):
    b = 3
    break # event date is after the end date of the episode

return b # Return a status code (b)

#####
#####
#     FETCH PATIENT / ADDRESS DATA
#####
#####
patient = {}; x = {}; adr = {}; adridx = {}; matchbig = {} # Initialize dictionaries for storing data

# Connect to the database + set start time + clear the patient dictionary
ret = read_ini_extra("/tmp/bob.ini") # Use read_ini_extra() to get debug mode from INI file
conn = pymssql.connect(server=ZHOST, user=ZUSER, password=ZPASS, database=ZDB)
zstart = datetime.now()

##### patient
#####
#####
patient.clear()
# Execute SQL query to fetch patient data from database in batches of 1000000
cursor = conn.cursor()
cursor.execute('SELECT id, date_of_death FROM [compass_gp].[dbo].[patient] ORDER BY id OFFSET 3000001 ROWS FETCH
NEXT 1000000 ROWS ONLY;')

# Loop through each patient data record and add the patient ID and date of death into the patient dictionary
row = cursor.fetchone()
c = 1
while row:
    if (c % 10000 == 0):
        print(c); # Print progress every 10000 rows
    id = row[0] # Patient ID
    date_of_death = row[1]
    patient[id] = [date_of_death]
    c = c + 1
    row = cursor.fetchone()
print(c) # Print the total number of fetched rows

##### patient registration record (episode_of_care)
#####
x.clear()
# Execute SQL query to fetch episode_of_care data from database into dictionary (x)
cursor = conn.cursor()
cursor.execute('SELECT id, patient_id, registration_type_concept_id, date_registered, date_registered_end FROM [compass_gp].[dbo].[episode_of_care];')

# Loop through each episode_of_care data record and add the episode_of_care ID, patient ID, registration type ID and
registration start/end dates for each patient
row = cursor.fetchone()
c = 1
while row:
    if (c % 10000 == 0):
        print(c) # Print progress every 10000 rows
    id = row[0] # Episode of care ID
    patient_id = row[1]
    type = row[2]
    date_start = row[3]
    date_end = row[4]

```

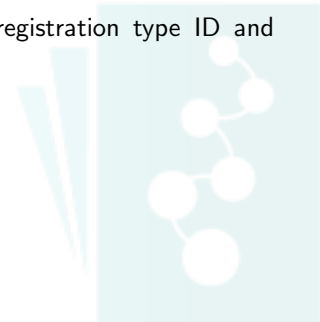

```

if (patient_id in patient): # Check the episode of care patient ID matches with patient ID in the patient dictionary
    x.setdefault(patient_id, []).append(str(id) + "~" + str(date_start) + "~" + str(date_end) + "~" + str(type)) # Add
episode data to the dictionary
c = c + 1
row = cursor.fetchone()
print(c) # Print the total number of fetched rows

##### patient address
#####
adr.clear()
adridx.clear()
# Execute SQL query to fetch patient address data from database into dictionaries (adr) and (adridx)
cursor = conn.cursor()
cursor.execute('SELECT id, patient_id, start_date, end_date, use_concept_id, lsoa_2011_code, msoa_2011_code FROM
[compass_gp].[dbo].[patient_address];')

# Loop through each patient address record
# Add (for each patient) address ID to dictionary (adridx) and patient ID, residency start/end date, use ID, LSOA and MSOA, as
a list, to dictionary (adr)
row = cursor.fetchone()
c = 1
while row:
    if (c % 10000 == 0):
        print(c) # Print progress every 10000 rows
    id = row[0] # Address ID
    patient_id = row[1]
    start_date = row[2]
    end_date = row[3]
    use = row[4]
    lsoa = row[5]
    msoa = row[6]
    if (patient_id in patient): # Check the patient_address patient ID matches with patient ID in the patient dictionary
        adr.setdefault(patient_id, []).append([id, str(start_date), str(end_date), str(use), str(lsoa), str(msoa), DH(str(start_date))])
# Add to dictionary adr(list)
    adridx[id] = [] # Add to dictionary (adridx)
    c = c + 1
    row = cursor.fetchone()
print(c) # Print the total number of fetched rows

##### patient address match
#####
matchbig.clear()
# Execute SQL query to fetch patient address match data from database into dictionaries
cursor = conn.cursor()
cursor.execute('SELECT id, patient_address_id, uprn, qualifier, uprn_property_classification FROM [compass_gp].[dbo].
[patient_address_match];')

# Loop through each patient address match record
# Add (for each address) match ID, address ID, uprn, qualifier and classification to dictionary (matchbig)
row = cursor.fetchone()
c = 1
while row:
    if (c % 10000 == 0):
        print(c) # Print progress every 10000 rows
    match_id = row[0]
    adr_id = row[1]
    if (adr_id not in adridx): # Check if the address ID exists in the adridx dictionary
        row = cursor.fetchone()
        continue
    uprn = row[2]
    qualifier = row[3]

```

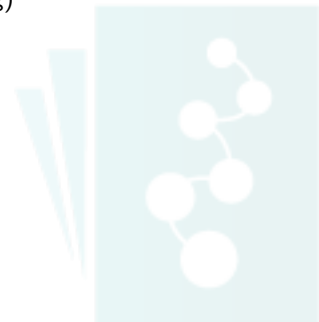

```

classification = row[4]
if (adr_id in matchbig): # Update dictionary (matchbig) with the latest match information for each address ID
  m_id = matchbig[adr_id][0]
  if (match_id > m_id):
    matchbig[adr_id] = [match_id, uprn, qualifier, classification]
else:
  matchbig[adr_id] = [match_id, uprn, qualifier, classification]
c = c + 1
row = cursor.fetchone()
print(c) # Print the total number of fetched rows

#####
#####
# MATCH PATIENT ADDRESS
#####
#####
event_date = str(sys.argv[1]) # takes input parameter
zevent_date = DH(event_date) # Use DH() to convert event_date into a numeric
uprn = ""

# Open a file for output and add the required headers
outputFile = open("/tmp/hh_output.txt", "w")
outputFile.write("patient_id\taddress_id\tuprn\taddress_start_date\taddress_end_date\taddress_use\tproperty_classification\tlsoa\tmsoa\n")

# Define dictionary (VPROP) with property codes
VPROP = {"R": "", "RD": "", "RD01": "", "RD02": "", "RD03": "", "RD04": "", "RD06": "", "RD07": "", "RD10": "", "RH02": "", "U": "", "UC": "", "UP": "", "X": ""}
# R = Residential
# RD = Dwelling
# RD01 = Caravan
# RD02 = Detached
# RD03 = Semi-Detached
# RD04 = Terraced
# RD06 = Self Contained Flat (Includes Maisonette / Apartment)
# RD07 = House Boat
# RD10 = Privately Owned Holiday Caravan / Chalet
# RH02 = HMO Bedsit / Other Non Self Contained Accommodation
# U = Unclassified
# UC = Awaiting Classification
# UP = Pending Internal Investigation
# X = Dual Use

# Loop through each patient in the patient dictionary
c = 1 # Initialize a counter for progress tracking
for nor in patient:
  if (c % 10000 == 0):
    print(c) # Print progress every 10000 patients
    c = c + 1
  ret = GMSV3(nor, event_date) # Use GMSV3() to determine the registration status of the patient
  if (ret == 2): # If the patient is dead (status code 2), write the patient ID and status to the output file
    outputFile.write(str(nor) + "\t2\n")
    continue
  if (nor in adr): # If the patient is in adr dictionary, sort addresses based on start date and address ID
    blist = sorted(adr[nor], key=lambda x: (x[6], x[0]), reverse=True)

    # SubLoop through each address associated with the patient
    # Extract patient_id, address ID, start date, end date, use concept ID, LSOA and MSOA into list (blist)
    for i in range(len(blist)):
      id = int(blist[i][0])
      start_date = blist[i][1]

```

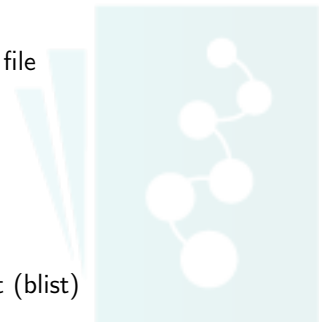

```

end_date = blist[i][2]
use = blist[i][3]
lsoa = blist[i][4]
msoa = blist[i][5]

#1335358 = Home
#1335360 = Temporary
#1335361 = Old / Incorrect
if (use == "1335360"): # If address concept ID is 1335360 (temporary address), skip
  continue

# If the address ID exists in matchbig dictionary, extract UPRN, qualifier, and classification
if (id in matchbig):
  uprn = matchbig[id][1]
  qualifier = matchbig[id][2]
  classification = matchbig[id][3]

if (uprn == ""): # If UPRN is empty, skip
  continue

if (classification not in VPROP.keys()): # If the classification is not in VPROP dictionary keys, skip
  continue

if (qualifier != "Best (residential) match"): # If the qualifier is not "Best (residential) match", skip
  continue

d1 = DH(start_date) # Convert start date to numeric
d2 = DH(end_date) # Convert end date to numeric

# If the event date is within the date range of the address, write address details to the output file
if (d1 <= zevent_date or d1 == 0) and (d2 >= zevent_date or d2 == 0):
  outputFile.write(str(nor) + "\t" + str(id) + "\t" + str(uprn) + "\t" + str(start_date) + "\t" + end_date + "\t"
    + use + "\t" + classification + "\t" + lsoa + "\t" + msoa + "\n")
  break # Exit the SubLoop back into the main Loop

# Close the output file + Database Connection. Print run times
outputFile.close()
conn.close()
print(zstart)
print(datetime.now())

```

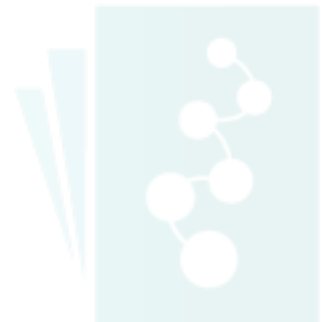

Supplementary Appendix 2: Proportions of the combinations of the four reasons a household RALF was not assigned to 10,025 children in the use case cohort

|       | <b>Multiple<br/>different valid<br/>household UPRNs</b> | <b>No valid<br/>household<br/>UPRNs</b> | <b>No address<br/>records at<br/>event date</b> | <b>Not alive or<br/>no regular<br/>registrations<br/>at event dates</b> | <b>Total</b> | <b>%</b> |
|-------|---------------------------------------------------------|-----------------------------------------|-------------------------------------------------|-------------------------------------------------------------------------|--------------|----------|
| 0000  | 0                                                       | 0                                       | 0                                               | 0                                                                       | 6            | 0.1      |
| 0001  | 0                                                       | 0                                       | 0                                               | 1                                                                       | 3,091        | 30.8     |
| 0100  | 0                                                       | 1                                       | 0                                               | 0                                                                       | 2,027        | 20.2     |
| 0101  | 0                                                       | 1                                       | 0                                               | 1                                                                       | 3,506        | 35.0     |
| 0110  | 0                                                       | 1                                       | 1                                               | 0                                                                       | 593          | 5.9      |
| 0111  | 0                                                       | 1                                       | 1                                               | 1                                                                       | 379          | 3.8      |
| 1000  | 1                                                       | 0                                       | 0                                               | 0                                                                       | 188          | 1.9      |
| 1001  | 1                                                       | 0                                       | 0                                               | 1                                                                       | 229          | 2.3      |
| 1100  | 1                                                       | 1                                       | 0                                               | 0                                                                       | 1            | 0.0      |
| 1101  | 1                                                       | 1                                       | 0                                               | 1                                                                       | 5            | 0.0      |
| Total |                                                         |                                         |                                                 |                                                                         | 10,025       | 100      |

Note: the combinations are in binary format where 1 = any of the person's multiple address records met the criteria.

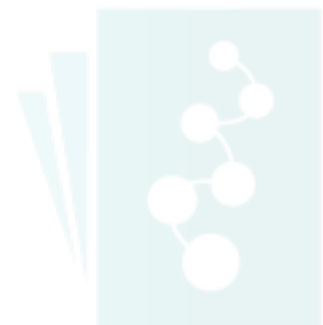

Supplement: ijpds-09-2379-s001.pdf [file ijpds-09-2379-s001.pdf]
